# Supplementary material
Source: PubMed Central journal article supplement (PMC8609457)
Supplement: jama-e2121699-s001.pdf [file jama-e2121699-s001.pdf]

## Supplemental Online Content

1  
2  
3  
4  
5  
6  
7  
8  
9  
10  
11  
12  
13

Jabagi MJ, Botton J, Bertrand M, et al. Myocardial infarction stroke and pulmonary embolism after BNT162b2 mRNA COVID-19 vaccine in people aged 75 and older. *JAMA*. doi:10.1001/jama.2021.21699

### **eMethods.**

**eTable.** *ICD-10* codes used to define severe cardiovascular events of interest

### **eReferences**

This supplemental material has been provided by the authors to give readers additional information about their work.

14 **eMethods**

15

16 *Self-controlled case series analysis*

17 Since vaccinated and unvaccinated subjects may vary by characteristics such as frailty and risk  
18 factors for cardiovascular events that are difficult to measure and control for, we undertook  
19 within-person comparisons using the self-controlled case-series method. The advantages of this  
20 method are that only cases are needed, and it is self-matched so that time-invariant  
21 multiplicative confounders are necessarily adjusted. The method<sup>1</sup> was initially described in 1995  
22 by Paddy Farrington and has been frequently adopted for vaccine safety evaluation.<sup>2,3,4,5,6</sup>

23 However, in order to take into consideration that the occurrence of severe cardiovascular events  
24 may delay or cancel post-event vaccination and the fact that these events may increase short-  
25 term mortality, we used an adaptation of the self-controlled case-series method: the SCCS  
26 model for event-dependent exposures.<sup>7</sup> In this approach, only exposures preceding the event's  
27 occurrence are considered to model the risk. In addition, the observation period of every case  
28 ended on April 30, 2021, irrespective of whether they died.

29 The observation period extended from December 15, 2020, to April 30, 2021, and included all  
30 four events of interest (acute myocardial infarction, hemorrhagic stroke, ischemic stroke, or  
31 pulmonary embolism) occurring in vaccinated and unvaccinated individuals of 75 years and  
32 over. Diagnoses were identified in the database using the ICD-10 codes (etable 1). Subjects  
33 vaccinated with a Covid-19 vaccine other than the BNT162b2 mRNA vaccine were excluded  
34 from the analysis. The inclusion of the unvaccinated individuals is required for this specific  
35 SCCS approach. Lack of vaccination may indicate cancellation of vaccination and may tend to  
36 occur more often for earlier events. Thus, to obtain the correct temporal effect and avoid bias in  
37 the relative incidence, unvaccinated cases must be included.

38 The exposure risk intervals, defined as the 15 days following each of the 1st and second doses  
39 of the vaccine, were subdivided into two sub-periods: a specific sub-interval corresponding to the  
40 same day of vaccination (day 0) and a sub-interval extending from 1 to 14 days after  
41 vaccination. The exposure risk interval was further subdivided into three sub-intervals: day 0;  
42 days 1 through 7; and 8 through 14. Day 0 was defined as a separate risk period to ensure it is  
43 not included in the control periods or the primary interest risk period (since a case is unlikely to  
44 be vaccinated when admitted to the hospital for an acute event). Unbiased estimating equations  
45 are used to calculate the relative incidence at each dose by comparing the incidence in the risk  
46 interval (1 to 14 days after each of the two vaccine doses) with the incidence in other post-  
47 exposure periods (non-risk periods), as required for the SCCS model for event-dependent  
48 exposure. In this model, all exposures that occur after an event are disregarded and treated as  
49 missing because their timing may depend on the event. Additional unbiased estimating  
50 equations using all observation time contribute to estimating the temporal effects. The estimating  
51 equations are derived under a counterfactual in which no exposures can occur after an event.  
52 Measures of the relative incidence were derived using R software (package SCCS)<sup>8</sup> adjusted for  
53 seasonality (in 7-days increments) to take into account any temporal changes in background  
54 rates.

55

56

57

58

59

60 **eTable.** *ICD-10* codes used to define severe cardiovascular events of interest

| ICD - 10 codes              |                                                    |
|-----------------------------|----------------------------------------------------|
|                             |                                                    |
| Acute myocardial infarction |                                                    |
| I21                         | Acute myocardial infarction                        |
| Ischemic stroke             |                                                    |
| I63                         | Cerebral infarction                                |
| I64                         | Stroke, not specified as hemorrhagic or infarction |
| Hemorrhagic stroke          |                                                    |
| I60                         | Subarachnoid hemorrhage                            |
| I61                         | Intracerebral hemorrhage                           |
| I62                         | Other non-traumatic intracranial hemorrhages       |
| Pulmonary embolism          |                                                    |
| I26                         | Pulmonary embolism                                 |

61

62

## 63 eReferences

64

- 65 1. Farrington, C. P. Relative incidence estimation from case series for vaccine safety  
66 evaluation. *Biometrics* **51**, 228–235 (1995).
- 67 2. Reddy, S. N. *et al.* Intussusception after Rotavirus Vaccine Introduction in India. *N. Engl.*  
68 *J. Med.* **383**, 1932–1940 (2020).
- 69 3. Tate, J. E. *et al.* Evaluation of Intussusception after Monovalent Rotavirus Vaccination in  
70 Africa. *N. Engl. J. Med.* **378**, 1521–1528 (2018).
- 71 4. Hanf, M. *et al.* Validation of the French national health insurance information system as a  
72 tool in vaccine safety assessment: application to febrile convulsions after pediatric  
73 measles/mumps/rubella immunization. *Vaccine* **31**, 5856–5862 (2013).
- 74 5. Stowe, J., Andrews, N., Ladhani, S. & Miller, E. The risk of intussusception following  
75 monovalent rotavirus vaccination in England: A self-controlled case-series evaluation. *Vaccine*  
76 **34**, 3684–3689 (2016).
- 77 6. Grave, C. *et al.* Seasonal influenza vaccine and Guillain-Barré syndrome: A self-  
78 controlled case series study. *Neurology* **94**, e2168–e2179 (2020).
- 79 7. Farrington, C. P., Whitaker, H. J. & Hocine, M. N. Case series analysis for censored,  
80 perturbed, or curtailed post-event exposures. *Biostatistics* **10**, 3–16 (2009).
- 81 8. Farrington, P., Whitaker, H. & Weldeselassie, Y. G. *Self-Controlled Case Series Studies:*  
82 *A Modelling Guide with R.* (Chapman and Hall/CRC, 2018).

83

84
